# Supplementary material for: Utilization of cyclocarbonated lignin as a bio-based cross-linker for the preparation of poly(hydroxy urethane)s
Source: Royal Society of Chemistry journal article supplement (doi:10.1039/c7ra03416d), 2017-01-01

## SUPPORTING INFO

DSC thermogram of PHU resin obtained from experiment number 1 (Table 1, entry 1. Blank reference)

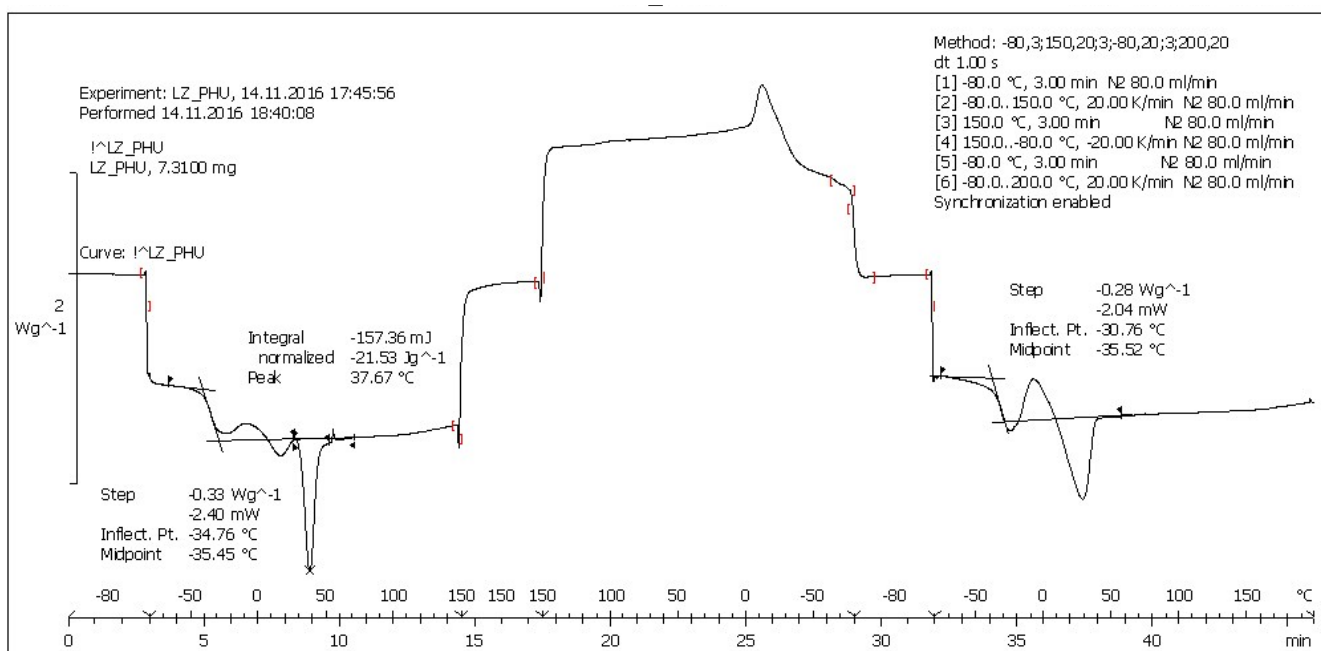

DSC thermogram of PHU resin obtained from experiment number 5 (Table 1, entry 5, PEG<sub>CC</sub>/Lign<sub>CC</sub> 10:1)

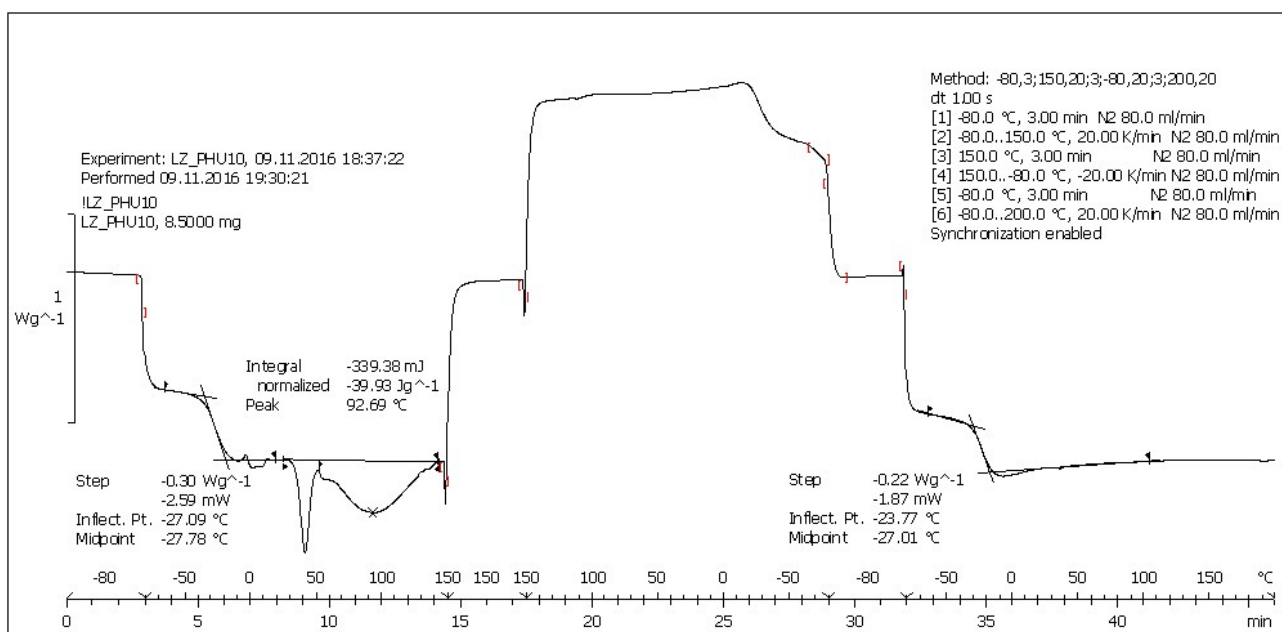

DSC thermogram of PHU resin obtained from experiment number 6 (Table 1, entry 6, PEG<sub>CC</sub>/Lign<sub>CC</sub> 4:1)

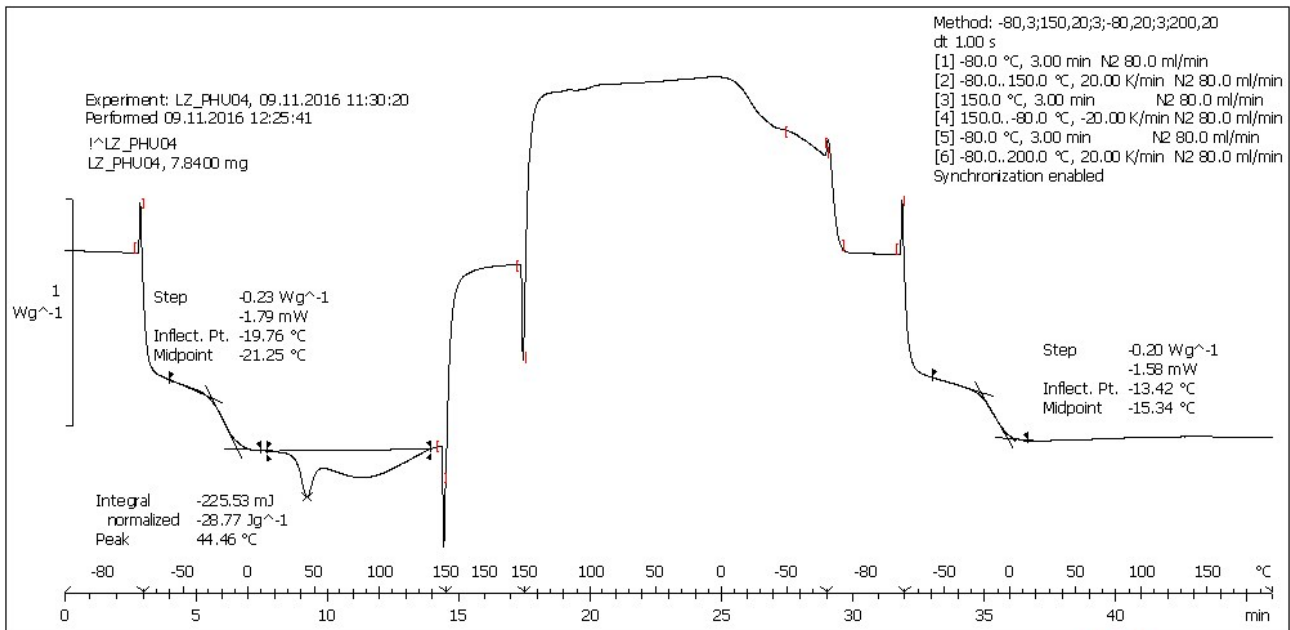

Supplement: c7ra03416d1.pdf [file c7ra03416d1.pdf]
